# Supplementary material for: Innate lymphoid cells and disease tolerance in SARS-CoV-2 infection
Source: bioRxiv or medRxiv preprint supplement (doi:10.1101/2021.01.14.21249839), 2021-10-11
Supplement: Supplementary file [file media-1.pdf]

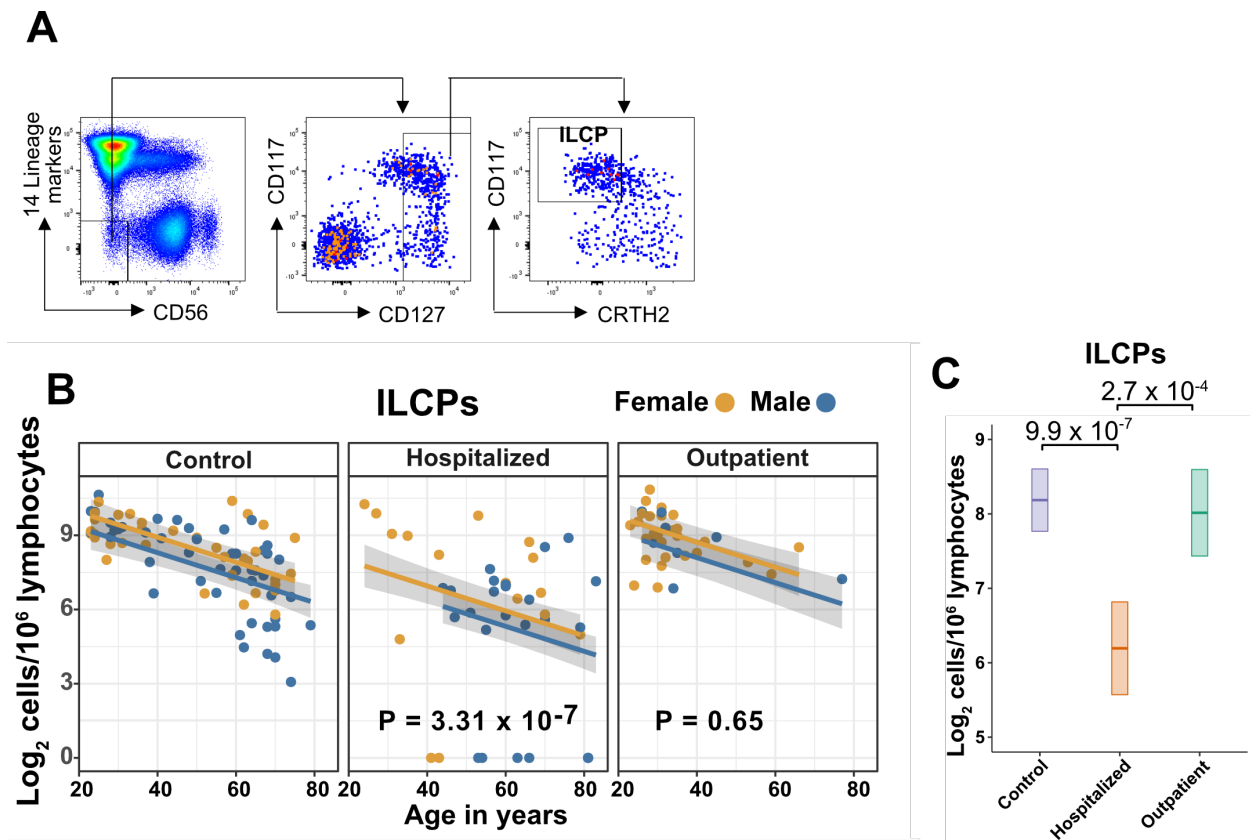

**Figure S1. Innate lymphoid cell precursors (ILCPs) decrease with age and are depleted in patients hospitalized with COVID-19**

(A) Representative gating for ILCP identification in PBMCs. Cells were first gated on lymphoid cells, singlets, live/dead, and  $\text{CD}45^+$ . Lineage (Lin) markers included antibodies against: CD3, CD4,  $\text{TCR}\alpha\beta$ ,  $\text{TCR}\gamma\delta$ , CD19, CD20, CD22, CD34,  $\text{Fc}\epsilon\text{R}1\alpha$ , CD11c, CD303, CD123, CD1a, and CD14.

(B) Effect of age (X-axis) on  $\text{log}_2$  ILCP abundance per million total lymphocytes (Y-axis). Each dot represents an individual blood donor, with yellow for female and blue for male. Shading represents the 95%CI. P-values are from the regression analysis for comparisons to the control group.

(C) Lymphoid cell abundance by group, shown as estimated marginal means with 95%CI, generated from the multiple linear regressions in (B), and averaged across age and sex. P-values represent pairwise comparisons on the estimated marginal means, adjusted for multiple comparisons with the Tukey method.

**A**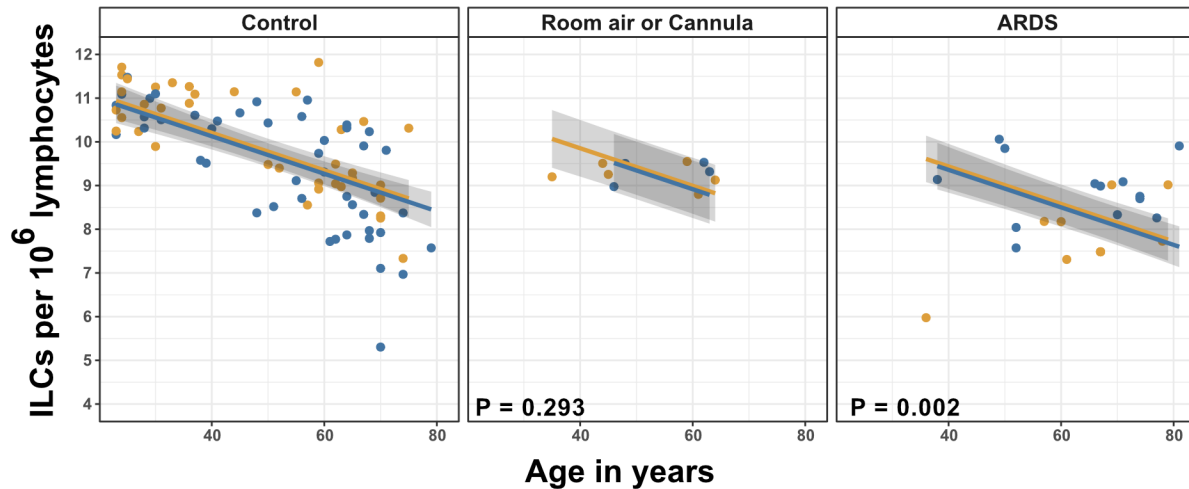**B**

**Group differences in ILC<sup>a</sup> abundance adjusted for age and sex**

| Group                        | Fold difference (log <sub>2</sub> ) [±95%CI] |
|------------------------------|----------------------------------------------|
| On room air or nasal cannula | -0.353 [-1.016, 0.309]                       |
| ARDS                         | -0.769** [-1.250, -0.288]                    |

\* p < 0.05, \*\* p < 0.01, \*\*\* p < 0.001

<sup>a</sup>per 10<sup>6</sup> lymphocytes

**Figure S2. Association of blood ILC depletion with COVID-19 severity in an independent cohort of adults.**

(A) Effect of age (X-axis) on log<sub>2</sub> ILC abundance per million total lymphocytes (Y-axis) in adult controls from this paper and patients with COVID-19 from Kuri-Cervantes et al., 2020. Patients were stratified into two groups by disease severity. The first group included patients maintained on room air or treated with O<sub>2</sub> by nasal cannula. The second group included those with ARDS. Each dot represents an individual blood donor, with yellow for female and blue for male. Shading represents the 95%CI. P-values are from the regression analysis for comparisons to the control group.

(C) Table of regression coefficients for log<sub>2</sub> fold difference in ILC abundance for patients with COVID-19, in comparison to the adult healthy control cohort, adjusted for effects of age and sex.

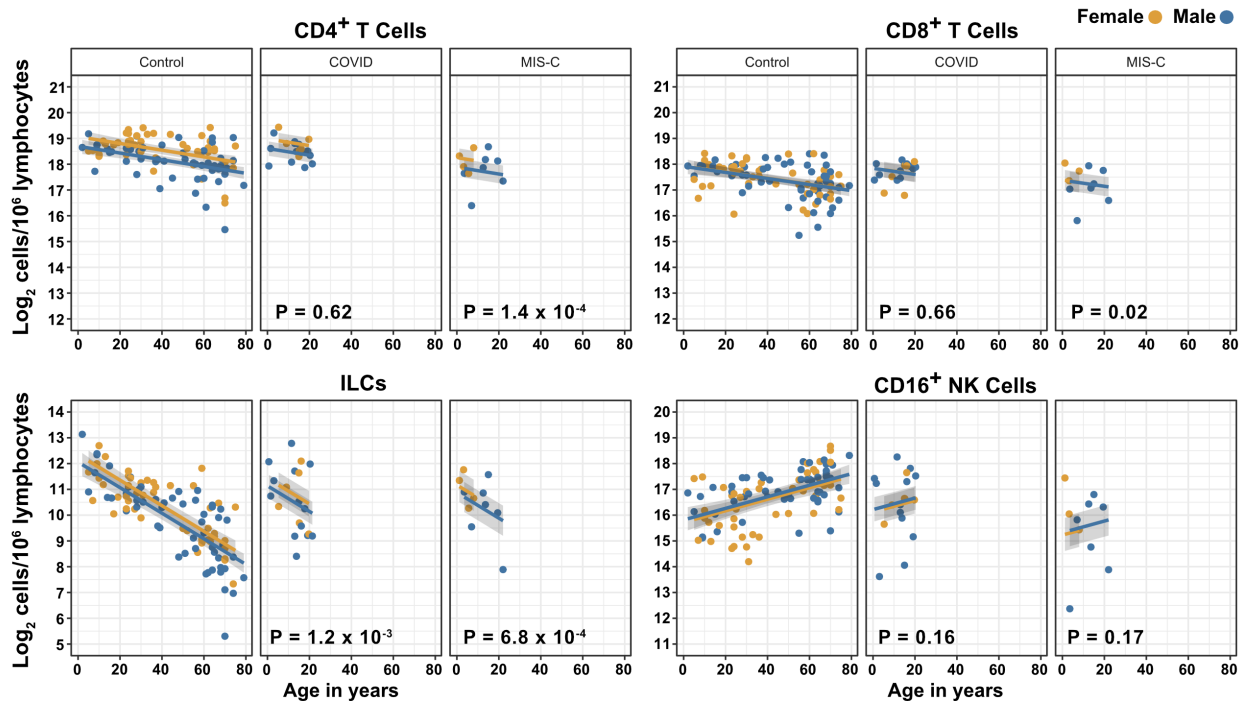

**Figure S3. Effects of pediatric COVID-19 and MIS-C on blood lymphoid cell subsets in comparison to full combined adult and pediatric control group**

Effect of age (X-axis) on log<sub>2</sub> abundance per million total lymphocytes of the indicated lymphoid cell populations (Y-axis). Each dot represents an individual blood donor, with yellow for female and blue for male. Shading represents the 95%CI. P-values are from the regression analysis for comparisons to the control group.

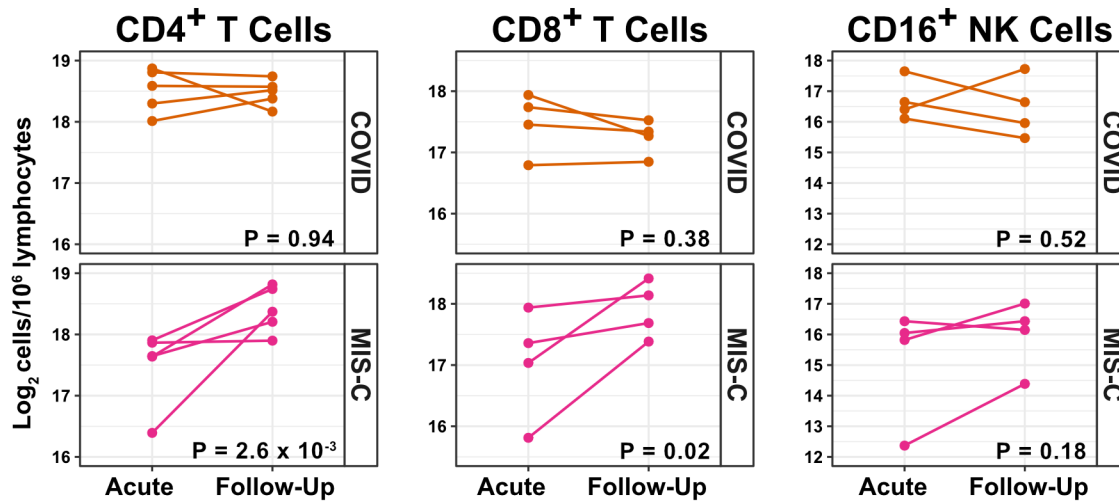

**Figure S4. T cells increase during follow-up from MIS-C**

Log<sub>2</sub> ILC abundance per million lymphocytes in longitudinal pairs of samples collected during acute presentation and during follow-up, from individual children with COVID-19 or MIS-C. P-values are for change in ILC abundance at follow-up, as determined with a linear mixed model, adjusting for age, sex, and group, and with patient as a random effect. Differences in sample size among cell types was due to limited sample availability.

**A**

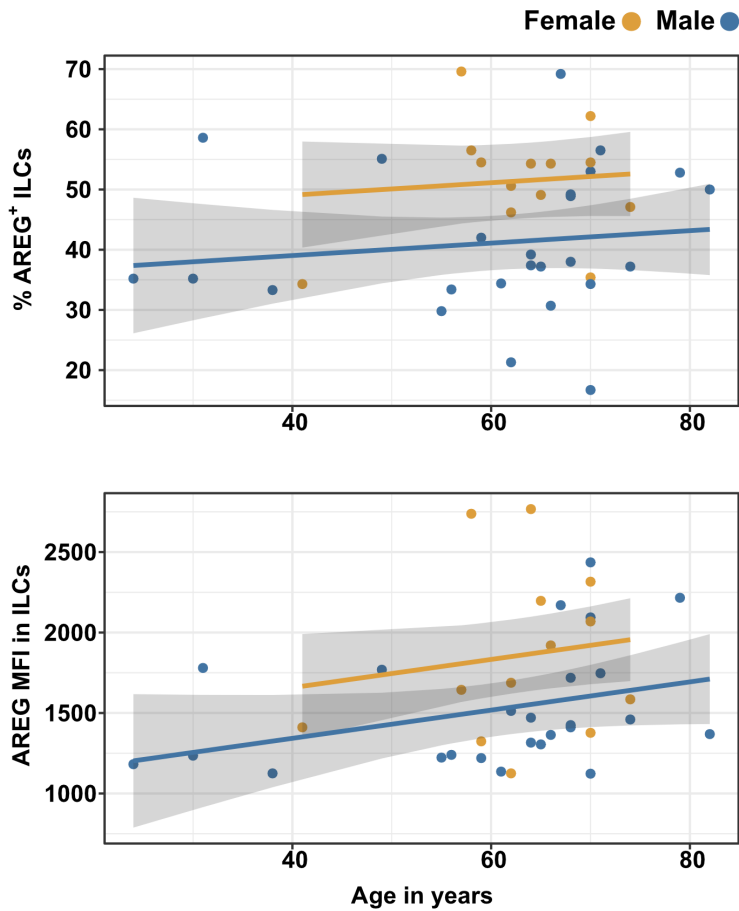

**Figure S5. Males have lower percent AREG<sup>+</sup> ILCs, and lower AREG MFI in ILCs, than do females, and there is no effect of age on these parameters**

(A) Effect of age (X-axis) on % AREG<sup>+</sup> ILCs or MFI in ILCs (Y-axis as indicated). Each dot represents an individual blood donor, with yellow for female and blue for male. Shading represents the 95%CI.

(B) Table of results for regression analyses plotted in (A)

**B**

| Difference [±95%CI] |                     |                     |
|---------------------|---------------------|---------------------|
|                     | % AREG <sup>+</sup> | MFI in ILCs         |
| Age                 | 0.103               | 8.764               |
|                     | [-0.190, 0.397]     | [-2.033, 19.561]    |
| Male                | -10.030*            | -314.816*           |
|                     | [-18.037, -2.023]   | [-609.660, -19.973] |
| R <sup>2</sup>      | 0.174               | 0.189               |

\* p < 0.05, \*\* p < 0.01, \*\*\* p < 0.001

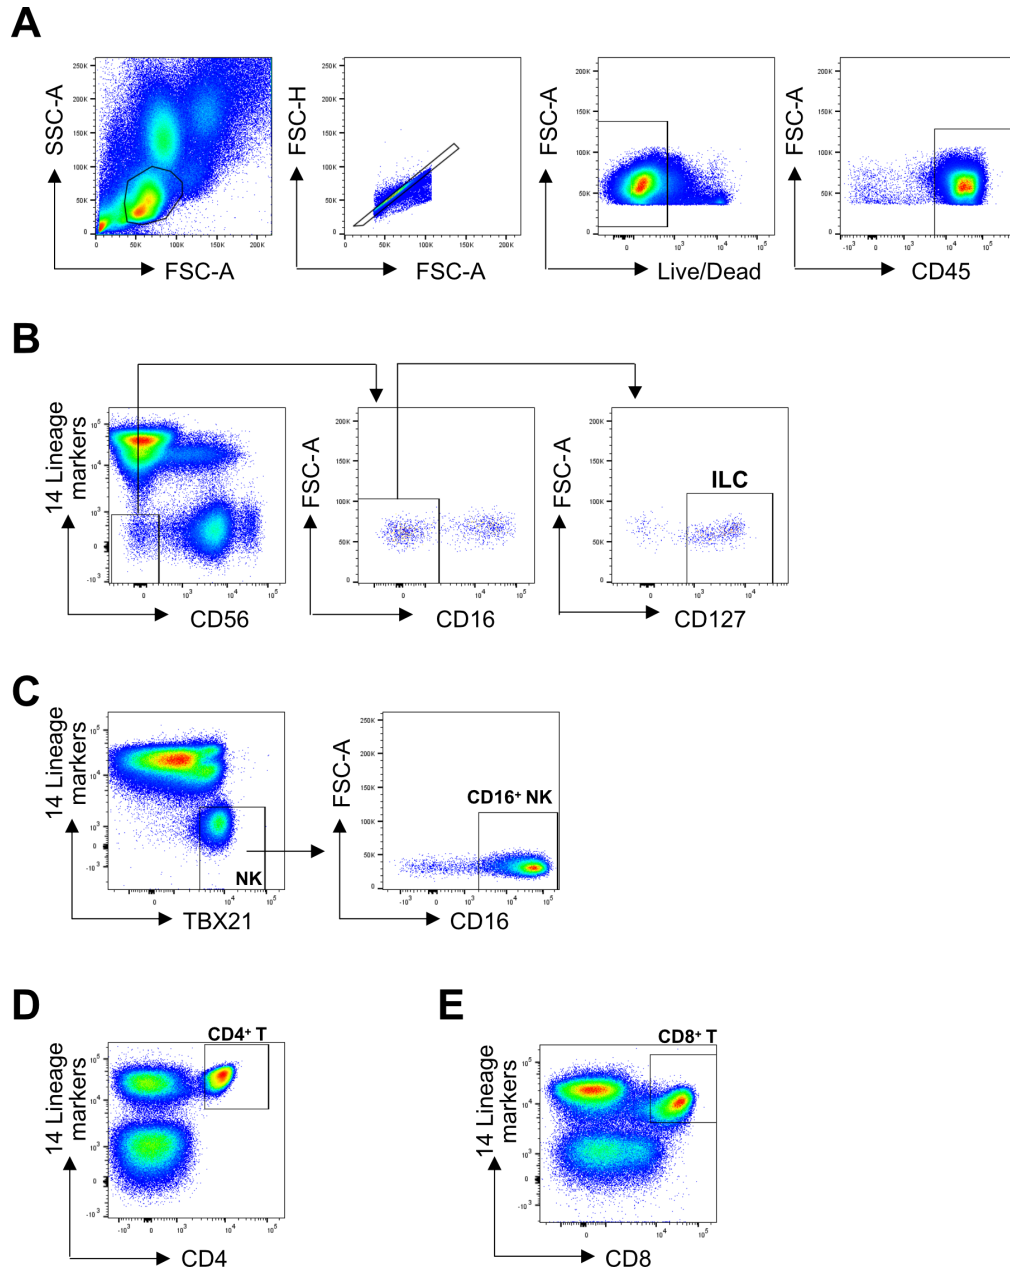

**Figure S6. Representative gating strategy**

(A) All cell subsets were first gated on lymphoid cells, singlets, live/dead, and CD45<sup>+</sup>. Lineage (Lin) markers included antibodies against: CD3, CD4, TCRαβ, TCRγδ, CD19, CD20, CD22, CD34, FcεR1α, CD11c, CD303, CD123, CD1a, and CD14.

(B) ILCs were identified as Lin<sup>-</sup>CD56<sup>-</sup>CD16<sup>-</sup>CD127<sup>+</sup> using 14 lineage markers

(C) CD16<sup>+</sup> NK cells were identified as Lin<sup>-</sup>TBX21<sup>+</sup>CD16<sup>+</sup>

(E) CD4<sup>+</sup> T cells were identified as Lin<sup>+</sup>CD4<sup>+</sup> (D), and CD8<sup>+</sup> T cells were identified as Lin<sup>+</sup>CD8<sup>+</sup>

---

**Table S1: Race and Ethnicity of Adult Cohorts**

---

| Characteristic                    | Healthy Control<br>N=86 | Hospitalized<br>N=40 | Outpatient<br>N=51 |
|-----------------------------------|-------------------------|----------------------|--------------------|
| Race or ethnic group – number (%) |                         |                      |                    |
| White                             | 25 (29.1)               | 17 (42.5)            | 46 (90.2)          |
| Black or African American         | 0 (0)                   | 6 (15)               | 2 (3.9)            |
| Asian                             | 1 (1.2)                 | 1 (2.5)              | 1 (2)              |
| Unknown or not reported           | 60 (69.8)               | 16 (40)              | 2 (3.9)            |
| Hispanic or latinx                | 1 (1.2)                 | 11 (27.5)            | 3 (5.9)            |

Percentages may not equal 100 because of rounding

**Table S2: Demographic and Clinical Characteristics of Pediatric Blood Donor Groups**

| <b>Characteristic</b>                                       | <b>Control<br/>N=17</b> | <b>COVID-19<br/>N=19</b> | <b>COVID follow-up<br/>N=14</b> | <b>MIS-C<br/>N=11</b> | <b>MISC-C follow-up<br/>N=7</b> |
|-------------------------------------------------------------|-------------------------|--------------------------|---------------------------------|-----------------------|---------------------------------|
| Mean age (range) - years                                    | 10.6 (2-19)             | 13 (0.7-21.4)            | 13.8 (1-22)                     | 10.1 (1.2-22)         | 6.3 (2.2-13.1)                  |
| Sex – number (%)                                            |                         |                          |                                 |                       |                                 |
| Male                                                        | 8 (47.1)                | 13 (68.4)                | 7 (50)                          | 7 (63.6)              | 5 (71.4)                        |
| Female                                                      | 9 (52.9)                | 6 (31.6)                 | 7 (50)                          | 4 (36.4)              | 2 (28.6)                        |
| Hospital admission for COVID-19 – number (%)                |                         | 11 (57.9)                | 4 (28.6)                        | 0                     | 0                               |
| Hospital admission for MIS-C – number (%)                   |                         |                          |                                 | 11 (100)              | 7 (100)                         |
| Intubation with mechanical ventilation or ECMO – number (%) |                         | 1 (5.3)                  | 0                               | 1 (9.1)               | 1 (14.3)                        |
| Deaths – number (%)                                         |                         | 0                        | 0                               | 0                     | 0                               |
| Mean time hospitalized (range) – days                       |                         | 8 (2-17)                 |                                 | 7.5 (1-16)            |                                 |
| Max lab value – mean (range)                                |                         |                          |                                 |                       |                                 |
| CRP – mg/L                                                  |                         | 119 (0.2-385)            |                                 | 161 (9-300)           |                                 |



**Table S3: Change in Lymphocyte Abundance Due to Age, Sex, and COVID-19 Severity in Adult cohorts**

| Fold difference (log2) [ $\pm$ 95%CI] |                            |
|---------------------------------------|----------------------------|
| <b>Lymphocytes<sup>a</sup></b>        |                            |
| Age                                   | -0.008*** [-0.012, -0.004] |
| Male                                  | -0.267*** [-0.400, -0.135] |
| Hospitalized                          | -0.411*** [-0.572, -0.250] |
| Outpatient                            | 0.129 [-0.030, 0.289]      |
| R <sup>2</sup>                        | 0.416                      |

\* p < 0.05, \*\* p < 0.01, \*\*\* p < 0.001

<sup>a</sup>per 10<sup>6</sup> PBMCs

**Table S4: Change in Cell Abundance Due to Age, Sex, and COVID-19 Severity**Fold difference (log2) [ $\pm$ 95%CI]

|                | <b>CD4<sup>+</sup> T<sup>a</sup></b> | <b>ILC<sup>a</sup></b> | <b>CD8<sup>+</sup> T<sup>a</sup></b> | <b>CD16<sup>+</sup> NK<sup>a</sup></b> |
|----------------|--------------------------------------|------------------------|--------------------------------------|----------------------------------------|
| Age            | -0.020***                            | -0.051***              | -0.017***                            | 0.014*                                 |
|                | [-0.029, -0.010]                     | [-0.063, -0.040]       | [-0.025, -0.008]                     | [0.002, 0.026]                         |
| Male           | -0.678***                            | -0.609**               | -0.411**                             | -0.049                                 |
|                | [-0.980, -0.375]                     | [-0.983, -0.235]       | [-0.688, -0.134]                     | [-0.435, 0.336]                        |
| Hospitalized   | -0.241                               | -1.280***              | -0.034                               | -1.466***                              |
|                | [-0.608, 0.126]                      | [-1.734, -0.826]       | [-0.369, 0.301]                      | [-1.932, -0.999]                       |
| Outpatient     | 0.461*                               | 0.009                  | 0.224                                | -0.276                                 |
|                | [0.099, 0.824]                       | [-0.441, 0.458]        | [-0.110, 0.558]                      | [-0.741, 0.189]                        |
| R <sup>2</sup> | 0.364                                | 0.552                  | 0.224                                | 0.194                                  |

\* p &lt; 0.05, \*\* p &lt; 0.01, \*\*\* p &lt; 0.001

<sup>a</sup>per 10<sup>6</sup> PBMCs

**Table S5: Odds of Hospitalization in Pediatric Cohort<sup>a</sup>**

| <b>Cell count<sup>b</sup></b> | <b>Odds Ratio<sup>c</sup></b> | <b>95% Confidence Interval</b> | <b>P-Value</b> |
|-------------------------------|-------------------------------|--------------------------------|----------------|
| <b>CD4<sup>+</sup> T</b>      | 1.75                          | 0.0593 – 43.3                  | 0.724          |
| <b>ILC</b>                    | 0.712                         | 0.26– 1.73                     | 0.463          |
| <b>CD8<sup>+</sup> T</b>      | 0.217                         | 0.00509 – 5.9                  | 0.366          |
| <b>CD16<sup>+</sup> NK</b>    | 0.386                         | 0.0554 – 1.23                  | 0.194          |

<sup>a</sup>Adjusted for age and sex

<sup>b</sup>per 10<sup>6</sup> lymphocytes

<sup>c</sup>per 2-fold increase in cell population abundance

**Table S6: Change in Pediatric Cohort Cell Abundance due to Group; Adjusted for Effects of Age and Sex with Combined Pediatric and Adult Control Data**

Fold difference (log2) [ $\pm$ 95%CI]

|                | <b>CD4<sup>+</sup> T<sup>a</sup></b> | <b>ILC<sup>a</sup></b> | <b>CD8<sup>+</sup> T<sup>a</sup></b> | <b>CD16<sup>+</sup> NK<sup>a</sup></b> |
|----------------|--------------------------------------|------------------------|--------------------------------------|----------------------------------------|
| COVID          | -0.085                               | -0.924**               | -0.078                               | 0.400                                  |
|                | [-0.421, 0.251]                      | [-1.474, -0.373]       | [-0.424, 0.269]                      | [-0.161, 0.961]                        |
| MIS-C          | -0.814***                            | -1.183***              | -0.538*                              | -0.493                                 |
|                | [-1.224, -0.404]                     | [-1.856, -0.511]       | [-0.969, -0.106]                     | [-1.190, 0.205]                        |
| R <sup>2</sup> | 0.292                                | 0.541                  | 0.165                                | 0.261                                  |

\* p < 0.05, \*\* p < 0.01, \*\*\* p < 0.001

<sup>a</sup>per 10<sup>6</sup> lymphocytes

| Table S7: Gene ontology analysis results |                                                     |           |          |          |            |            |                                                                                  |       |
|------------------------------------------|-----------------------------------------------------|-----------|----------|----------|------------|------------|----------------------------------------------------------------------------------|-------|
| ID                                       | Description                                         | GeneRatio | BgRatio  | pvalue   | p.adjust   | qvalue     | geneID                                                                           | Count |
| GO:0032616                               | interleukin-13 production                           | 7/294     | 17/9263  | 4.47E-07 | 0.00112026 | 0.00100638 | IL17RA/NLRP3/IL18/TNFSF4/ARG2/GATA3/RARA                                         | 7     |
| GO:0042092                               | type 2 immune response                              | 8/294     | 25/9263  | 6.33E-07 | 0.00112026 | 0.00100638 | NLRP3/CD81/IL18/BCL3/TNFSF4/ARG2/GATA3/RARA                                      | 8     |
| GO:0002711                               | positive regulation of T cell mediated immunity     | 9/294     | 36/9263  | 1.28E-06 | 0.00122325 | 0.0010989  | NLRP3/CD81/IL18/HLA-B/IL23R/HSPD1/TNFSF4/HLA-A/GATA3                             | 9     |
| GO:0045064                               | T-helper 2 cell differentiation                     | 6/294     | 13/9263  | 1.38E-06 | 0.00122325 | 0.0010989  | NLRP3/IL18/BCL3/TNFSF4/GATA3/RARA                                                | 6     |
| GO:0002830                               | positive regulation of type 2 immune response       | 6/294     | 14/9263  | 2.35E-06 | 0.00123526 | 0.00110969 | NLRP3/CD81/IL18/TNFSF4/GATA3/RARA                                                | 6     |
| GO:0002828                               | regulation of type 2 immune response                | 7/294     | 21/9263  | 2.40E-06 | 0.00123526 | 0.00110969 | NLRP3/CD81/IL18/TNFSF4/ARG2/GATA3/RARA                                           | 7     |
| GO:0002709                               | regulation of T cell mediated immunity              | 10/294    | 49/9263  | 2.44E-06 | 0.00123526 | 0.00110969 | NLRP3/CD81/IL18/HLA-B/IL23R/HSPD1/TNFSF4/HLA-A/GATA3/WAS                         | 10    |
| GO:0032656                               | regulation of interleukin-13 production             | 6/294     | 15/9263  | 3.82E-06 | 0.00169036 | 0.00151854 | IL17RA/NLRP3/TNFSF4/ARG2/GATA3/RARA                                              | 6     |
| GO:0002708                               | positive regulation of lymphocyte mediated immunity | 12/294    | 79/9263  | 6.38E-06 | 0.00212609 | 0.00190997 | NLRP3/CD81/IL18/HLA-B/CD28/LAMP1/IL23R/HSPD1/TNFSF4/HLA-A/GATA3/EXOSC6           | 12    |
| GO:0002706                               | regulation of lymphocyte mediated immunity          | 14/294    | 107/9263 | 6.60E-06 | 0.00212609 | 0.00190997 | NLRP3/CD81/IL18/HLA-B/CD28/LAMP1/IL23R/HSPD1/TNFSF4/HLA-A/ARRB2/GATA3/EXOSC6/WAS | 14    |
| GO:0046631                               | alpha-beta T cell activation                        | 14/294    | 107/9263 | 6.60E-06 | 0.00212609 | 0.00190997 | RASAL3/FOXP1/NLRP3/CD81/IL18/RC3H1/CD28/BCL3/IL23R/TCF7/TNFSF4/ARG2/GATA3/RARA   | 14    |
| GO:0035710                               | CD4-positive, alpha-beta T                          | 11/294    | 69/9263  | 9.66E-06 | 0.00274122 | 0.00246257 | FOXP1/NLRP3/CD81/IL18/RC3H1/BCL3/IL23R/TNF                                       | 11    |

|            |                                                          |        |          |          |            |            |                                                                                                                                                                                                   |    |
|------------|----------------------------------------------------------|--------|----------|----------|------------|------------|---------------------------------------------------------------------------------------------------------------------------------------------------------------------------------------------------|----|
|            | cell activation                                          |        |          |          |            |            | SF4/ARG2/GATA3/RARA                                                                                                                                                                               |    |
| GO:0051251 | positive regulation of lymphocyte activation             | 20/294 | 209/9263 | 1.02E-05 | 0.00274122 | 0.00246257 | CD6/RASAL3/NLRP3/GRAP2/CD81/IL18/CD28/FLT3LG/CD5/LAMP1/IL23R/HSPD1/TNFSF4/RAC1/CDC42/ADAM8/CSK/GATA3/RARA/EXOSC6                                                                                  | 20 |
| GO:0050870 | positive regulation of T cell activation                 | 17/294 | 159/9263 | 1.11E-05 | 0.00274122 | 0.00246257 | CD6/RASAL3/NLRP3/GRAP2/CD81/IL18/CD28/CD5/IL23R/HSPD1/TNFSF4/RAC1/CDC42/ADAM8/CSK/GATA3/RARA                                                                                                      | 17 |
| GO:0032736 | positive regulation of interleukin-13 production         | 5/294  | 23316    | 1.23E-05 | 0.00274122 | 0.00246257 | IL17RA/NLRP3/TNFSF4/GATA3/RARA                                                                                                                                                                    | 5  |
| GO:0042093 | T-helper cell differentiation                            | 9/294  | 47/9263  | 1.36E-05 | 0.00274122 | 0.00246257 | FOXP1/NLRP3/IL18/RC3H1/BCL3/IL23R/TNFSF4/GATA3/RARA                                                                                                                                               | 9  |
| GO:2000514 | regulation of CD4-positive, alpha-beta T cell activation | 9/294  | 47/9263  | 1.36E-05 | 0.00274122 | 0.00246257 | NLRP3/CD81/IL18/RC3H1/IL23R/TNFSF4/ARG2/GATA3/RARA                                                                                                                                                | 9  |
| GO:0050863 | regulation of T cell activation                          | 21/294 | 232/9263 | 1.44E-05 | 0.00274122 | 0.00246257 | CD6/RASAL3/CASP3/NLRP3/GRAP2/CD81/IL18/RC3H1/CD28/CD5/IL23R/HSPD1/LAT/TNFSF4/RAC1/ARG2/CDC42/ADAM8/CSK/GATA3/RARA                                                                                 | 21 |
| GO:0046634 | regulation of alpha-beta T cell activation               | 11/294 | 72/9263  | 1.47E-05 | 0.00274122 | 0.00246257 | RASAL3/NLRP3/CD81/IL18/RC3H1/CD28/IL23R/TNFSF4/ARG2/GATA3/RARA                                                                                                                                    | 11 |
| GO:0046649 | lymphocyte activation                                    | 34/294 | 498/9263 | 1.83E-05 | 0.00302412 | 0.00271671 | CD6/RASAL3/FOXP1/CASP3/NLRP3/GRAP2/CD81/IL18/RC3H1/IRF2BP2/CD28/FLT3LG/CD5/HDAC9/LAMP1/BCL3/PLCG2/IL23R/AKAP17A/TCF7/HSPD1/LAT/TNFSF4/RAC1/ARG2/ZBTB7A/DC42/ADAM8/CSK/GATA3/RARA/EXOSC6/STK11/WAS | 34 |

|            |                                                                                                                                                  |        |          |          |            |            |                                                                                                                              |    |
|------------|--------------------------------------------------------------------------------------------------------------------------------------------------|--------|----------|----------|------------|------------|------------------------------------------------------------------------------------------------------------------------------|----|
| GO:0002824 | positive regulation of adaptive immune response based on somatic recombination of immune receptors built from immunoglobulin superfamily domains | 11/294 | 74/9263  | 1.92E-05 | 0.00302412 | 0.00271671 | NLRP3/CD81/IL18/HLA-B/CD28/IL23R/HS PD1/TNFSF4/HLA-A/GATA3/EXOSC6                                                            | 11 |
| GO:0002294 | CD4-positive, alpha-beta T cell differentiation involved in immune response                                                                      | 9/294  | 49/9263  | 1.94E-05 | 0.00302412 | 0.00271671 | FOXP1/NLRP3/IL18/RC3H1/BCL3/IL23R/TNFSF4/GATA3/RARA                                                                          | 9  |
| GO:0002822 | regulation of adaptive immune response based on somatic recombination of immune receptors built from immunoglobulin superfamily domains          | 13/294 | 103/9263 | 2.10E-05 | 0.00302412 | 0.00271671 | NLRP3/CD81/IL18/RC3H1/HLA-B/CD28/IL23R/HS PD1/TNFSF4/HLA-A/GATA3/EXOSC6/WAS                                                  | 13 |
| GO:0022407 | regulation of cell-cell adhesion                                                                                                                 | 23/294 | 276/9263 | 2.16E-05 | 0.00302412 | 0.00271671 | CD6/RASAL3/CASP3/NLRP3/GRAP2/CD81/IL18/RC3H1/CD28/CD5/TNR/IL23R/ADAM19/HSPD1/TNFSF4/RAC1/ARG2/CD42/ADAM8/CSK/GATA3/RGCC/RARA | 23 |
| GO:0022409 | positive regulation of cell-cell adhesion                                                                                                        | 18/294 | 185/9263 | 2.27E-05 | 0.00302412 | 0.00271671 | CD6/RASAL3/NLRP3/GRAP2/CD81/IL18/CD28/CD5/IL23R/ADAM19/HSPD1/TNFSF4/RAC1/CDC42/ADAM8/CSK/GATA3/RARA                          | 18 |
| GO:0002287 | alpha-beta T cell activation involved in immune response                                                                                         | 9/294  | 50/9263  | 2.31E-05 | 0.00302412 | 0.00271671 | FOXP1/NLRP3/IL18/RC3H1/BCL3/IL23R/TNFSF4/GATA3/RARA                                                                          | 9  |

|            |                                                               |        |          |          |            |            |                                                                                                                                             |    |
|------------|---------------------------------------------------------------|--------|----------|----------|------------|------------|---------------------------------------------------------------------------------------------------------------------------------------------|----|
| GO:0002293 | alpha-beta T cell differentiation involved in immune response | 9/294  | 50/9263  | 2.31E-05 | 0.00302412 | 0.00271671 | FOXP1/NLRP3/IL18/RC3H1/BCL3/IL23R/TNFSF4/GATA3/RARA                                                                                         | 9  |
| GO:0002285 | lymphocyte activation involved in immune response             | 15/294 | 136/9263 | 2.54E-05 | 0.00321286 | 0.00288626 | FOXP1/NLRP3/CD81/IL18/RC3H1/CD28/LAMP1/BCL3/PLCG2/IL23R/HSPD1/TNFSF4/GATA3/RARA/EXOSC6                                                      | 15 |
| GO:1903039 | positive regulation of leukocyte cell-cell adhesion           | 17/294 | 171/9263 | 2.90E-05 | 0.00354228 | 0.0031822  | CD6/RASAL3/NLRP3/GRAP2/CD81/IL18/CD28/CD5/IL23R/HSPD1/TNFSF4/RAC1/CDC42/ADAM8/CSK/GATA3/RARA                                                | 17 |
| GO:1903037 | regulation of leukocyte cell-cell adhesion                    | 20/294 | 225/9263 | 3.01E-05 | 0.00354723 | 0.00318665 | CD6/RASAL3/CASP3/NLRP3/GRAP2/CD81/IL18/RC3H1/CD28/CD5/IL23R/HSPD1/TNFSF4/RAC1/ARG2/CDC42/ADAM8/CSK/GATA3/RARA                               | 20 |
| GO:0042110 | T cell activation                                             | 26/294 | 344/9263 | 3.46E-05 | 0.00384309 | 0.00345243 | CD6/RASAL3/FOXP1/CASP3/NLRP3/GRAP2/CD81/IL18/RC3H1/CD28/CD5/BCL3/IL23R/TCF7/HSPD1/LAT/TNFSF4/RAC1/ARG2/CDC42/ADAM8/CSK/GATA3/RARA/STK11/WAS | 26 |
| GO:0045785 | positive regulation of cell adhesion                          | 22/294 | 265/9263 | 3.47E-05 | 0.00384309 | 0.00345243 | CD6/RASAL3/NLRP3/GRAP2/CD81/IL18/DOCK5/CD28/CD5/SPOCK2/IL23R/ADAM19/HSPD1/RSU1/TNFSF4/RAC1/CDC42/ADAM8/CSK/GATA3/RARA/ITGB1BP1              | 22 |
| GO:0002821 | positive regulation of adaptive immune response               | 11/294 | 79/9263  | 3.61E-05 | 0.00387396 | 0.00348017 | NLRP3/CD81/IL18/HLA-B/CD28/IL23R/HSPD1/TNFSF4/HLA-A/GATA3/EXOSC6                                                                            | 11 |
| GO:0046640 | regulation of alpha-beta T cell proliferation                 | 6/294  | 22/9263  | 4.72E-05 | 0.00482039 | 0.00433039 | RASAL3/CD81/IL18/CD28/TNFSF4/ARG2                                                                                                           | 6  |



|            |                                                    |        |          |          |            |            |                                                                                                                                                                                |    |
|------------|----------------------------------------------------|--------|----------|----------|------------|------------|--------------------------------------------------------------------------------------------------------------------------------------------------------------------------------|----|
| GO:0051249 | regulation of lymphocyte activation                | 24/294 | 310/9263 | 4.76E-05 | 0.00482039 | 0.00433039 | CD6/RASAL3/CASP3/NLRP3/GRAP2/CD81/IL18/RC3H1/CD28/FLT3LG/CD5/LAMP1/IL23R/HSPD1/LAT/TNFSF4/RAC1/ARG2/CDC42/ADAM8/CSK/GATA3/RARA/EXOSC6                                          | 24 |
| GO:002696  | positive regulation of leukocyte activation        | 20/294 | 235/9263 | 5.59E-05 | 0.00549879 | 0.00493983 | CD6/RASAL3/NLRP3/GRAP2/CD81/IL18/CD28/FLT3LG/CD5/LAMP1/IL23R/HSPD1/TNFSF4/RAC1/CDC42/ADAM8/CSK/GATA3/RARA/EXOSC6                                                               | 20 |
| GO:002292  | T cell differentiation involved in immune response | 9/294  | 56/9263  | 5.90E-05 | 0.00564657 | 0.00507259 | FOXP1/NLRP3/IL18/RC3H1/BCL3/IL23R/TNFSF4/GATA3/RARA                                                                                                                            | 9  |
| GO:0043367 | CD4-positive, alpha-beta T cell differentiation    | 9/294  | 57/9263  | 6.81E-05 | 0.00634978 | 0.00570432 | FOXP1/NLRP3/IL18/RC3H1/BCL3/IL23R/TNFSF4/GATA3/RARA                                                                                                                            | 9  |
| GO:0050865 | regulation of cell activation                      | 27/294 | 381/9263 | 7.46E-05 | 0.00677255 | 0.00608411 | CD6/RASAL3/CASP3/NLRP3/GRAP2/CD81/IL18/RC3H1/CD28/FLT3LG/CD5/LAMP1/LMO4/IL23R/HSPD1/TSPAN32/LAT/TNFSF4/RAC1/ARG2/CDC42/ADAM8/CSK/GATA3/RARA/EXOSC6/TCEC                        | 27 |
| GO:001817  | regulation of cytokine production                  | 31/294 | 468/9263 | 7.76E-05 | 0.00686707 | 0.00616902 | PCBP2/HSF1/CD6/FOXP1/HSPA1B/IL17RA/NLRP3/CD81/IL18/IRAK3/DDX3X/LTB/CD28/HDAC9/HSPA1A/BCL3/TXK/PLCG2/IFNGR1/IL23R/HSPD1/TMSB4X/TNFSF4/RAC1/ARG2/ADAM8/CSK/ARRB2/GATA3/RGCC/RARA | 31 |
| GO:0050867 | positive regulation of cell activation             | 20/294 | 241/9263 | 7.96E-05 | 0.00687411 | 0.00617535 | CD6/RASAL3/NLRP3/GRAP2/CD81/IL18/CD28/FLT3LG/CD5/LAMP1/IL23R/HSPD1/TNFSF4/RAC1/CDC42/ADAM8/CSK/G                                                                               | 20 |

|            |                                                    |        |          |            |            |            |                                                                                                                                                                       |    |
|------------|----------------------------------------------------|--------|----------|------------|------------|------------|-----------------------------------------------------------------------------------------------------------------------------------------------------------------------|----|
|            |                                                    |        |          |            |            |            | ATA3/RARA/EXOSC6                                                                                                                                                      |    |
| GO:0031295 | T cell costimulation                               | 8/294  | 46/9263  | 8.54E-05   | 0.00701177 | 0.00629902 | GRAP2/CD81/CD28/CD5/TNFSF4/RAC1/CDC42/CSK                                                                                                                             | 8  |
| GO:0030155 | regulation of cell adhesion                        | 29/294 | 427/9263 | 8.60E-05   | 0.00701177 | 0.00629902 | CD6/RASAL3/CASP3/CD164/NLRP3/GRAP2/CD81/IL18/RC3H1/DOCK5/CD28/CD5/SPOCK2/TNR/IL23R/ADAM19/HSPD1/RSU1/TNFSF4/RAC1/ARG2/CDC42/ADAM8/CSK/ARHGDI/GATA3/RGCC/RARA/ITGB1BP1 | 29 |
| GO:0002705 | positive regulation of leukocyte mediated immunity | 12/294 | 102/9263 | 8.78E-05   | 0.00701177 | 0.00629902 | NLRP3/CD81/IL18/HLA-B/CD28/LAMP1/IL23R/HSPD1/TNFSF4/HLA-A/GATA3/EXOSC6                                                                                                | 12 |
| GO:0002819 | regulation of adaptive immune response             | 13/294 | 118/9263 | 8.91E-05   | 0.00701177 | 0.00629902 | NLRP3/CD81/IL18/RC3H1/HLA-B/CD28/IL23R/HSPD1/TNFSF4/HLA-A/GATA3/EXOSC6/WAS                                                                                            | 13 |
| GO:0031294 | lymphocyte costimulation                           | 8/294  | 47/9263  | 0.00010016 | 0.00771021 | 0.00692646 | GRAP2/CD81/CD28/CD5/TNFSF4/RAC1/CDC42/CSK                                                                                                                             | 8  |
| GO:0046633 | alpha-beta T cell proliferation                    | 6/294  | 25/9263  | 0.00010332 | 0.00778396 | 0.00699271 | RASAL3/CD81/IL18/CD28/TNFSF4/ARG2                                                                                                                                     | 6  |
| GO:0007159 | leukocyte cell-cell adhesion                       | 20/294 | 247/9263 | 0.00011181 | 0.0082481  | 0.00740967 | CD6/RASAL3/CASP3/NLRP3/GRAP2/CD81/IL18/RC3H1/CD28/CD5/IL23R/HSPD1/TNFSF4/RAC1/ARG2/CDC42/ADAM8/CSK/GATA3/RARA                                                         | 20 |
| GO:0045622 | regulation of T-helper cell differentiation        | 6/294  | 26/9263  | 0.00013077 | 0.00922661 | 0.00828871 | NLRP3/IL18/RC3H1/IL23R/TNFSF4/RARA                                                                                                                                    | 6  |
| GO:0002286 | T cell activation involved in immune response      | 10/294 | 76/9263  | 0.00013302 | 0.00922661 | 0.00828871 | FOXP1/NLRP3/CD81/IL18/RC3H1/BCL3/IL23R/TNFSF4/GATA3/RARA                                                                                                              | 10 |
| GO:0043370 | regulation of CD4-positive, alpha-beta T cell      | 7/294  | 37/9263  | 0.00013713 | 0.00922661 | 0.00828871 | NLRP3/IL18/RC3H1/IL23R/TNFSF4/GATA3/RARA                                                                                                                              | 7  |

|            |                                                        |        |          |            |            |            |                                                                                                                                                                                |    |
|------------|--------------------------------------------------------|--------|----------|------------|------------|------------|--------------------------------------------------------------------------------------------------------------------------------------------------------------------------------|----|
|            | differentiation                                        |        |          |            |            |            |                                                                                                                                                                                |    |
| GO:0002726 | positive regulation of T cell cytokine production      | 5/294  | 17/9263  | 0.00014071 | 0.00922661 | 0.00828871 | NLRP3/CD81/IL18/TNFSF4/GATA3                                                                                                                                                   | 5  |
| GO:0045624 | positive regulation of T-helper cell differentiation   | 5/294  | 17/9263  | 0.00014071 | 0.00922661 | 0.00828871 | NLRP3/IL18/IL23R/TNFSF4/RARA                                                                                                                                                   | 5  |
| GO:0046641 | positive regulation of alpha-beta T cell proliferation | 5/294  | 17/9263  | 0.00014071 | 0.00922661 | 0.00828871 | RASAL3/CD81/IL18/CD28/TNFSF4                                                                                                                                                   | 5  |
| GO:0097190 | apoptotic signaling pathway                            | 29/294 | 440/9263 | 0.00014545 | 0.00936448 | 0.00841257 | YWHAZ/TRADD/BCL2L12/CASP3/HSPA1B/GNAI2/XPA/HINT1/DDX3X/MPV17L/MAL/TNFSF12/CD28/RRM2B/CD5/CHCHD10/LAMP1/HSPA1A/SLC9A3R1/BCL3/TMC8/YWHAB/SKIL/ARRB2/JUN/PPP3CC/STK11/CDKN2D/IFI6 | 29 |
| GO:0002456 | T cell mediated immunity                               | 10/294 | 77/9263  | 0.00014866 | 0.00939995 | 0.00844443 | NLRP3/CD81/IL18/HLA-B/IL23R/HSPD1/TNFSF4/HLA-A/GATA3/WAS                                                                                                                       | 10 |
| GO:0046635 | positive regulation of alpha-beta T cell activation    | 8/294  | 50/9263  | 0.00015745 | 0.00978149 | 0.00878719 | RASAL3/NLRP3/CD81/IL18/CD28/IL23R/TNFSF4/RARA                                                                                                                                  | 8  |
| GO:0032754 | positive regulation of interleukin-5 production        | 4/294  | 10/9263  | 0.00017948 | 0.01077211 | 0.00967711 | IL17RA/NLRP3/GATA3/RARA                                                                                                                                                        | 4  |
| GO:0045628 | regulation of T-helper 2 cell differentiation          | 4/294  | 10/9263  | 0.00017948 | 0.01077211 | 0.00967711 | NLRP3/IL18/TNFSF4/RARA                                                                                                                                                         | 4  |
| GO:0032753 | positive regulation of interleukin-4 production        | 5/294  | 18/9263  | 0.0001898  | 0.01120117 | 0.01006255 | NLRP3/CD28/TNFSF4/GATA3/RARA                                                                                                                                                   | 5  |
| GO:0002694 | regulation of leukocyte activation                     | 25/294 | 361/9263 | 0.00019874 | 0.01153673 | 0.01036401 | CD6/RASAL3/CASP3/NLRP3/GRAP2/CD81/IL18/RC3H1/CD28/FLT3LG/CD5/LAMP1/IL23R/HSPD1/TSPAN32/LAT/TNFSF4/RAC1/ARG2/CD42/ADAM8/CSK/                                                    | 25 |

|            |                                                                   |        |          |            |            |            |                                                                                                                                                          |    |
|------------|-------------------------------------------------------------------|--------|----------|------------|------------|------------|----------------------------------------------------------------------------------------------------------------------------------------------------------|----|
|            |                                                                   |        |          |            |            |            | GATA3/RARA/EXOSC6                                                                                                                                        |    |
| GO:0046632 | alpha-beta T cell differentiation                                 | 10/294 | 80/9263  | 0.00020518 | 0.01161193 | 0.01043156 | FOXP1/NLRP3/IL18/RC3H1/BCL3/IL23R/TCF7/TNFSF4/GATA3/RARA                                                                                                 | 10 |
| GO:0002250 | adaptive immune response                                          | 22/294 | 299/9263 | 0.0002066  | 0.01161193 | 0.01043156 | CD6/NLRP3/CD81/IL18/RC3H1/LIME1/HLA-B/TAP2/CD28/BCL3/TXK/IL23R/HS PD1/LAT/TNFSF4/ARG2/CSK/HLA-A/GATA3/EXOSC6/TEC/WAS                                     | 22 |
| GO:0001818 | negative regulation of cytokine production                        | 16/294 | 182/9263 | 0.00021414 | 0.01184782 | 0.01064347 | PCBP2/HSF1/NLRP3/IRAK3/HDAC9/BCL3/IL23R/TMSB4X/TNFSF4/RAC1/ARG2/CSK/ARRB2/GATA3/RGCC/RARA                                                                | 16 |
| GO:2000516 | positive regulation of CD4-positive, alpha-beta T cell activation | 6/294  | 29/9263  | 0.00024901 | 0.01348373 | 0.01211309 | NLRP3/CD81/IL18/IL23R/TNFSF4/RARA                                                                                                                        | 6  |
| GO:0098609 | cell-cell adhesion                                                | 27/294 | 410/9263 | 0.00025132 | 0.01348373 | 0.01211309 | CD6/RASAL3/CASP3/CD164/NLRP3/GRAP2/CD81/IL18/RC3H1/CD28/CD5/TNR/IL23R/DAM19/HSPD1/TSPAN32/PCDH9/TNFSF4/RAC1/ARG2/CDC42/ADAM8/CSK/GATA3/RGCC/RARA/BLOC1S4 | 27 |
| GO:1903311 | regulation of mRNA metabolic process                              | 20/294 | 266/9263 | 0.00030239 | 0.01598128 | 0.01435676 | YWHAZ/HSF1/NUP98/HNRNPA0/RC3H1/YBX1/ELAVL1/HSPA1A/SFSWAP/SNRNP70/RBM17/SF3B4/ANP32A/U2AF2/CPSF7/YWHAB/KHSRP/ZBTB7A/PTBP1/EXOSC6                          | 20 |
| GO:0007264 | small GTPase mediated signal transduction                         | 24/294 | 350/9263 | 0.00030894 | 0.01608776 | 0.01445242 | TNK2/RASAL3/GRAP2/SH3BP1/MAPKAP1/ABCA1/DOCK5/CFL1/SPRY1/STMN3/PSD4/DNMT1/GDI1/RAB11B/RAB2A/LAT/PLEKHG3/RAC1/TAGAP/CDC42/ARHGEF18/ARHGDI/JUN/WAS          | 24 |

|            |                                                                       |        |          |            |            |            |                                                                                                                                                        |    |
|------------|-----------------------------------------------------------------------|--------|----------|------------|------------|------------|--------------------------------------------------------------------------------------------------------------------------------------------------------|----|
| GO:0045197 | establishment or maintenance of epithelial cell apical/basal polarity | 5/294  | 20/9263  | 0.00032597 | 0.01659748 | 0.01491032 | ANK1/SH3BP1/SLC9A3R1/MARK2/CDC42                                                                                                                       | 5  |
| GO:0002703 | regulation of leukocyte mediated immunity                             | 14/294 | 152/9263 | 0.00032811 | 0.01659748 | 0.01491032 | NLRP3/CD81/IL18/HLA-B/CD28/LAMP1/IL23R/HSPD1/TNFSF4/HLA-A/ARRB2/GATA3/EXOSC6/WAS                                                                       | 14 |
| GO:0051645 | Golgi localization                                                    | 4/294  | 12/9263  | 0.00040227 | 0.01966457 | 0.01766564 | YWHAZ/SLC9A3R1/CDC42/STK11                                                                                                                             | 4  |
| GO:0002724 | regulation of T cell cytokine production                              | 5/294  | 21/9263  | 0.00041682 | 0.01966457 | 0.01766564 | NLRP3/CD81/IL18/TNFSF4/GATA3                                                                                                                           | 5  |
| GO:0032673 | regulation of interleukin-4 production                                | 5/294  | 21/9263  | 0.00041682 | 0.01966457 | 0.01766564 | NLRP3/CD28/TNFSF4/GATA3/RARA                                                                                                                           | 5  |
| GO:0035088 | establishment or maintenance of apical/basal cell polarity            | 5/294  | 21/9263  | 0.00041682 | 0.01966457 | 0.01766564 | ANK1/SH3BP1/SLC9A3R1/MARK2/CDC42                                                                                                                       | 5  |
| GO:0061245 | establishment or maintenance of bipolar cell polarity                 | 5/294  | 21/9263  | 0.00041682 | 0.01966457 | 0.01766564 | ANK1/SH3BP1/SLC9A3R1/MARK2/CDC42                                                                                                                       | 5  |
| GO:0032655 | regulation of interleukin-12 production                               | 7/294  | 44/9263  | 0.00042206 | 0.01966457 | 0.01766564 | FOXP1/IRAK3/LTB/IL23R/HSPD1/TNFSF4/ARRB2                                                                                                               | 7  |
| GO:0032615 | interleukin-12 production                                             | 7/294  | 45/9263  | 0.00048644 | 0.02237001 | 0.02009606 | FOXP1/IRAK3/LTB/IL23R/HSPD1/TNFSF4/ARRB2                                                                                                               | 7  |
| GO:1902532 | negative regulation of intracellular signal transduction              | 23/294 | 340/9263 | 0.00049896 | 0.02265149 | 0.02034894 | BCL2L12/RASAL3/GNAI2/SESN1/NLRP3/IRAK3/DDX3X/SH3BP1/MAKPAP1/RRM2B/CRTC3/SPRY1/TAOK3/HSPA1A/STMN3/SLC9A3R1/TMSB4X/CSK/ARRB2/STK11/ITGB1BP1/CDKN2D/CALM3 | 23 |
| GO:0008285 | negative regulation of cell population proliferation                  | 25/294 | 384/9263 | 0.00050608 | 0.02268384 | 0.020378   | HSF1/MXD4/CASP3/HSPA1B/CD164/RC3H1/SPRY1/HSPA1A/SLC9A3R1/KLF13/TSPAN32/HPGDS/ARG2/CSK/DACH1/JUN/GATA3/SKI/RGC/RARA/SF1/STK                             | 25 |

|            |                                                                                                     |        |          |            |            |            |                                                                                                                                                               |    |
|------------|-----------------------------------------------------------------------------------------------------|--------|----------|------------|------------|------------|---------------------------------------------------------------------------------------------------------------------------------------------------------------|----|
|            |                                                                                                     |        |          |            |            |            | 11/ITGB1BP1/CDKN2D/PTGDR2                                                                                                                                     |    |
| GO:0050778 | positive regulation of immune response                                                              | 29/294 | 475/9263 | 0.00052503 | 0.02323912 | 0.02087683 | FOXP1/NLRP3/GAP2/CD81/IL18/RC3H1/LIME1/HLA-B/KRT1/CD28/LAMP1/TXK/PLCG2/IL23R/HSPD1/LAT/TNFSF4/RAC1/CDC42/ADAM8/CSK/HLA-A/GATA3/RGCC/RARA/EXOSC6/TEC/STK11/WAS | 29 |
| GO:0007265 | Ras protein signal transduction                                                                     | 20/294 | 278/9263 | 0.00053512 | 0.02339329 | 0.02101533 | RASAL3/GRAP2/MAPKAP1/ABCA1/CFL1/SPRY1/STMN3/PSD4/DNMT1/GDI1/RAB11B/RAB2A/LAT/PLEKHG3/RAC1/CDC42/ARHGEF18/ARHGDI/JUN/WAS                                       | 20 |
| GO:0032634 | interleukin-5 production                                                                            | 4/294  | 13/9263  | 0.00056661 | 0.02417319 | 0.02171595 | IL17RA/NLRP3/GATA3/RARA                                                                                                                                       | 4  |
| GO:0032674 | regulation of interleukin-5 production                                                              | 4/294  | 13/9263  | 0.00056661 | 0.02417319 | 0.02171595 | IL17RA/NLRP3/GATA3/RARA                                                                                                                                       | 4  |
| GO:0010631 | epithelial cell migration                                                                           | 14/294 | 161/9263 | 0.00058925 | 0.02454725 | 0.02205199 | EMC10/PFN1/FOX1/SH3BP1/TNFSF12/DOCK5/HDAC9/TMSB4X/JUN/GATA3/RGCC/ITGB1BP1/GIPC1/CORO1B                                                                        | 14 |
| GO:0090132 | epithelium migration                                                                                | 14/294 | 161/9263 | 0.00058925 | 0.02454725 | 0.02205199 | EMC10/PFN1/FOX1/SH3BP1/TNFSF12/DOCK5/HDAC9/TMSB4X/JUN/GATA3/RGCC/ITGB1BP1/GIPC1/CORO1B                                                                        | 14 |
| GO:1901028 | regulation of mitochondrial outer membrane permeabilization involved in apoptotic signaling pathway | 6/294  | 34/9263  | 0.00061697 | 0.02540324 | 0.02282097 | YWHAZ/MPV17L/CHCHD10/HSPA1A/YWHAB/PPP3CC                                                                                                                      | 6  |
| GO:0090130 | tissue migration                                                                                    | 14/294 | 162/9263 | 0.00062695 | 0.0255177  | 0.02292379 | EMC10/PFN1/FOX1/SH3BP1/TNFSF12/DOCK5/HDAC9/TMSB4X/JUN/GATA3/RGCC/ITGB1BP1/GIPC1/CORO1B                                                                        | 14 |
| GO:0035148 | tube formation                                                                                      | 9/294  | 76/9263  | 0.00063713 | 0.02563715 | 0.0230311  | PFN1/CASP3/CFIL1/LMO4/SEMA4                                                                                                                                   | 9  |

|            |                                                                        |        |          |            |            |            |                                                                                                     |    |
|------------|------------------------------------------------------------------------|--------|----------|------------|------------|------------|-----------------------------------------------------------------------------------------------------|----|
|            |                                                                        |        |          |            |            |            | C/GATA3/SKI/RARA/ITGB1BP1                                                                           |    |
| GO:0043372 | positive regulation of CD4-positive, alpha-beta T cell differentiation | 5/294  | 23/9263  | 0.00065427 | 0.02603114 | 0.02338504 | NLRP3/IL18/IL23R/TNFSF4/RARA                                                                        | 5  |
| GO:002449  | lymphocyte mediated immunity                                           | 15/294 | 182/9263 | 0.00066703 | 0.02624382 | 0.0235761  | NLRP3/CD81/IL18/HLA-B/CD28/LAMP1/BCL3/IL23R/HSPD1/TNFSF4/HLA-A/ARRB2/GATA3/EXOSC6/WAS               | 15 |
| GO:0008637 | apoptotic mitochondrial changes                                        | 10/294 | 93/9263  | 0.0007006  | 0.02726177 | 0.02449058 | YWHAZ/MPV17L/CHCHD10/HSPA1A/HSPD1/YWHA B/ARRB2/JUN/PPP3CC/IF16                                      | 10 |
| GO:0035743 | CD4-positive, alpha-beta T cell cytokine production                    | 4/294  | 14/9263  | 0.00077356 | 0.02945354 | 0.02645955 | NLRP3/CD81/IL18/GATA3                                                                               | 4  |
| GO:0071526 | semaphorinplexin signaling pathway                                     | 4/294  | 14/9263  | 0.00077356 | 0.02945354 | 0.02645955 | SH3BP1/RAC1/ARRHGDI/SEMA4C                                                                          | 4  |
| GO:0001667 | ameboidal-type cell migration                                          | 16/294 | 205/9263 | 0.00080684 | 0.03039383 | 0.02730426 | EMC10/PFN1/FOXP1/SH3BP1/TNFSF12/DOCK5/CFL1/HDAC9/TMSB4X/JUN/SEMA4C/GATA3/RGCC/ITGB1BP1/GIPC1/CORO1B | 16 |
| GO:0030010 | establishment of cell polarity                                         | 9/294  | 79/9263  | 0.00084717 | 0.03157699 | 0.02836715 | SH3BP1/CFL1/SPRY1/SLC9A3R1/MARK2/CDC42/GATA3/STK11/FAM89B                                           | 9  |
| GO:0032496 | response to lipopolysaccharide                                         | 17/294 | 228/9263 | 0.00093407 | 0.03413906 | 0.03066878 | JUNB/HSF1/CD6/FOXP1/CASP3/NFKBIB/NLRP3/HNRNPA0/IL18/IRAK3/ABCA1/PLCG2/IL23R/TNFSF4/JUN/PLSCR3/RARA  | 17 |
| GO:0046637 | regulation of alpha-beta T cell differentiation                        | 7/294  | 50/9263  | 0.00093519 | 0.03413906 | 0.03066878 | NLRP3/IL18/RC3H1/IL23R/TNFSF4/GATA3/RARA                                                            | 7  |
| GO:2001233 | regulation of apoptotic signaling pathway                              | 20/294 | 291/9263 | 0.00094953 | 0.03430913 | 0.03082156 | YWHAZ/TRADD/BCL2L12/HSPA1B/GNAI2/DDX3X/MPV17L/MAL/TNFSF12/RRM2B/CHCHD10/HSPA1A                      | 20 |

|            |                                                         |        |          |            |            |            |                                                                                                                        |    |
|------------|---------------------------------------------------------|--------|----------|------------|------------|------------|------------------------------------------------------------------------------------------------------------------------|----|
|            |                                                         |        |          |            |            |            | /SLC9A3R1/TMC8/YWHAB/SKIL/ARRB2/PPP3CC/C/DKN2D/IFI6                                                                    |    |
| GO:0043542 | endothelial cell migration                              | 11/294 | 114/9263 | 0.00096189 | 0.03440449 | 0.03090723 | EMC10/FOXP1/SH3BP1/TNFSF12/HDAC9/TMSB4X/GATA3/RGCC/ITGB1BP1/GIPC1/CORO1B                                               | 11 |
| GO:0032233 | positive regulation of actin filament bundle assembly   | 6/294  | 37/9263  | 0.00098464 | 0.03452097 | 0.03101187 | PFN1/SORBS3/RAC1/CDC42/RGCC/ITGB1BP1                                                                                   | 6  |
| GO:0032720 | negative regulation of tumor necrosis factor production | 6/294  | 37/9263  | 0.00098464 | 0.03452097 | 0.03101187 | HSF1/IRAK3/BCL3/ARG2/ARRB2/RARA                                                                                        | 6  |
| GO:0051492 | regulation of stress fiber assembly                     | 7/294  | 51/9263  | 0.00105506 | 0.03662713 | 0.03290393 | PFN1/SORBS3/RAC1/CDC42/RGCC/ITGB1BP1/WAS                                                                               | 7  |
| GO:0001838 | embryonic epithelial tube formation                     | 8/294  | 66/9263  | 0.00108608 | 0.0373378  | 0.03354236 | PFN1/CASP3/CFL1/LMO4/SEMA4C/GATA3/SKI/RARA                                                                             | 8  |
| GO:0042692 | muscle cell differentiation                             | 13/294 | 153/9263 | 0.0011388  | 0.03848069 | 0.03456908 | CASP3/MORF4L2/CD81/FLT3LG/HDAC9/DNMT1/G6PD/PTBP1/CDC42/ARRB2/SEMA4C/SKI/RARA                                           | 13 |
| GO:0002697 | regulation of immune effector process                   | 19/294 | 274/9263 | 0.00114105 | 0.03848069 | 0.03456908 | PCBP2/NLRP3/CD81/IL18/RC3H1/IRAK3/HLA-B/CD28/LAMP1/IL23R/HSPD1/TSPAN32/TNFSF4/HLA-A/ARRB2/GATA3/RARA/EXOSC6/WAS        | 19 |
| GO:0032633 | interleukin-4 production                                | 5/294  | 26/9263  | 0.00118306 | 0.03919758 | 0.03521309 | NLRP3/CD28/TNFSF4/GATA3/RARA                                                                                           | 5  |
| GO:0001819 | positive regulation of cytokine production              | 21/294 | 318/9263 | 0.00118445 | 0.03919758 | 0.03521309 | CD6/HSPA1B/IL17RA/NLRP3/CD81/IL18/DDX3X/LTB/CD28/HSPA1A/BCL3/TXK/PLCG2/IFNGR1/IL23R/HSPD1/TNFSF4/ADAM8/GATA3/RGCC/RARA | 21 |
| GO:0072175 | epithelial tube formation                               | 8/294  | 67/9263  | 0.00120007 | 0.03934686 | 0.0353472  | PFN1/CASP3/CFL1/LMO4/SEMA4C/GATA3/SKI/RARA                                                                             | 8  |



|                |                                                                              |        |          |                |                |                |                                                                                                                                                         |    |
|----------------|------------------------------------------------------------------------------|--------|----------|----------------|----------------|----------------|---------------------------------------------------------------------------------------------------------------------------------------------------------|----|
| GO:19<br>03556 | negative regulation of tumor necrosis factor superfamily cytokine production | 6/294  | 39/9263  | 0.0013<br>1033 | 0.042218<br>06 | 0.03792<br>654 | HSF1/IRAK3/BCL3/ARG2/ARRB2/RARA                                                                                                                         | 6  |
| GO:00<br>16331 | morphogenesis of embryonic epithelium                                        | 8/294  | 68/9263  | 0.0013<br>2341 | 0.042218<br>06 | 0.03792<br>654 | PFN1/CASP3/CFI1/LMO4/SEMA4C/GATA3/SKI/RARA                                                                                                              | 8  |
| GO:00<br>32649 | regulation of interferon-gamma production                                    | 8/294  | 68/9263  | 0.0013<br>2341 | 0.042218<br>06 | 0.03792<br>654 | IL18/BCL3/TXK/IL23R/HSPD1/TNFSF4/GATA3/RARA                                                                                                             | 8  |
| GO:00<br>02237 | response to molecule of bacterial origin                                     | 17/294 | 236/9263 | 0.0013<br>6499 | 0.043155<br>73 | 0.03876<br>889 | JUNB/HSF1/CD6/FOXP1/CASP3/NFKBIB/NLRP3/HNRPNA0/IL18/IRAK3/ABCA1/PLCG2/IL23R/TNFSF4/JUN/PLSCR3/RARA                                                      | 17 |
| GO:00<br>51347 | positive regulation of transferase activity                                  | 25/294 | 412/9263 | 0.0013<br>8916 | 0.043531<br>04 | 0.03910<br>605 | GADD45A/GADD45G/CD81/IL18/UBE2S/DDX3X/MAPKAP1/TAOK3/DGKZ/JTB/MARK2/RPS2/LMO4/PFKFB2/IL23R/LAT/TMSB4X/AXIN1/SELRINC5/ADAM8/CSK/RGCC/STK11/ITGB1BP1/CALM3 | 25 |
| GO:00<br>02369 | T cell cytokine production                                                   | 5/294  | 27/9263  | 0.0014<br>1474 | 0.043561<br>7  | 0.03913<br>359 | NLRP3/CD81/IL18/TNFSF4/GATA3                                                                                                                            | 5  |
| GO:00<br>33120 | positive regulation of RNA splicing                                          | 5/294  | 27/9263  | 0.0014<br>1474 | 0.043561<br>7  | 0.03913<br>359 | NUP98/HSPA1A/SNRNP70/SF3B4/U2AF2                                                                                                                        | 5  |
| GO:00<br>30098 | lymphocyte differentiation                                                   | 18/294 | 258/9263 | 0.0014<br>296  | 0.043639<br>67 | 0.03920<br>364 | FOXP1/NLRP3/IL18/RC3H1/IRF2BP2/CD28/FLT3LG/HDAC9/BCL3/PLCG2/IL23R/TCF7/TNFSF4/ZBTB7A/ADAM8/GATA3/RARA/STK11                                             | 18 |
| GO:00<br>42129 | regulation of T cell proliferation                                           | 10/294 | 103/9263 | 0.0015<br>4901 | 0.046823<br>46 | 0.04206<br>379 | CD6/RASAL3/CASP3/CD81/IL18/RC3H1/CD28/IL23R/TNFSF4/ARG2                                                                                                 | 10 |
| GO:00<br>10634 | positive regulation of epithelial cell migration                             | 9/294  | 86/9263  | 0.0015<br>6034 | 0.046823<br>46 | 0.04206<br>379 | EMC10/PFN1/FOXP1/DOCK5/HDAC9/TMSB4X/JUN/GATA3/ITGB1BP1                                                                                                  | 9  |
| GO:00<br>02699 | positive regulation of immune                                                | 13/294 | 159/9263 | 0.0016<br>179  | 0.048142<br>73 | 0.04324<br>895 | NLRP3/CD81/IL18/HLA-B/CD28/LAMP1/IL23R/HSPD1/TNF                                                                                                        | 13 |

|            |                                                       |        |          |            |            |            |                                                                        |    |
|------------|-------------------------------------------------------|--------|----------|------------|------------|------------|------------------------------------------------------------------------|----|
|            | effector process                                      |        |          |            |            |            | SF4/HLA-A/GATA3/RARA/EXOSC6                                            |    |
| GO:0110020 | regulation of actomyosin structure organization       | 7/294  | 55/9263  | 0.00166    | 0.04898389 | 0.04400461 | PFN1/SORBS3/RAC1/CDC42/RGCC/ITGB1BP1/WAS                               | 7  |
| GO:0007163 | establishment or maintenance of cell polarity         | 11/294 | 122/9263 | 0.00167725 | 0.04908393 | 0.04409448 | ANK1/SH3BP1/MAPKAP1/CFL1/SPRY1/SLC9A3R1/MARK2/CDC42/GATA3/STK11/FAM89B | 11 |
| GO:0032816 | positive regulation of natural killer cell activation | 4/294  | 17/9263  | 0.00170588 | 0.04951251 | 0.04447949 | IL18/FLT3LG/LAMP1/IL23R                                                | 4  |

| <b>Table S8: Primers for bulk RNA-Seq</b>                                                             |
|-------------------------------------------------------------------------------------------------------|
| <b>Barcoded primers for reverse transcription and final library amplification in bulk RNA-Seq</b>     |
| Reverse transcription primers for 5 ILC sorted from blood (raw reads deposited in GSM5134071)         |
| donor 1 ILCs:<br>GCCGGTAATACGACTCACTATAGGGAGTTCTACAGTCCGACGATCNNNNNNGTTGCATTTTTTTTTTTTTTTTTTTTTT      |
| donor 2 ILCs:<br>GCCGGTAATACGACTCACTATAGGGAGTTCTACAGTCCGACGATCNNNNNACCATGTTTTTTTTTTTTTTTTTTTTT        |
| donor 3 ILCs:<br>GCCGGTAATACGACTCACTATAGGGAGTTCTACAGTCCGACGATCNNNNNACTCGATTTTTTTTTTTTTTTTTTTTTT       |
| donor 4 ILCs:<br>GCCGGTAATACGACTCACTATAGGGAGTTCTACAGTCCGACGATCNNNNNACGTACTTTTTTTTTTTTTTTTTTTTTT       |
| donor 5 ILCs:<br>GCCGGTAATACGACTCACTATAGGGAGTTCTACAGTCCGACGATCNNNNNCTGTGATTTTTTTTTTTTTTTTTTTTTT       |
| Reverse transcription primers for 4 ILC samples sorted from blood (raw reads deposited in GSM5134072) |
| donor1 ILCs:<br>GCCGGTAATACGACTCACTATAGGGAGTTCTACAGTCCGACGATCNNNNNTCACCATTTTTTTTTTTTTTTTTTTTTT        |
| donor2 ILCs:<br>GCCGGTAATACGACTCACTATAGGGAGTTCTACAGTCCGACGATCNNNNNTCTGTCTTTTTTTTTTTTTTTTTTTTTT        |
| donor3 ILCs:<br>GCCGGTAATACGACTCACTATAGGGAGTTCTACAGTCCGACGATCNNNNNNGTTGAGTTTTTTTTTTTTTTTTTTTTT        |
| donor4 ILCs:<br>GCCGGTAATACGACTCACTATAGGGAGTTCTACAGTCCGACGATCNNNNNACAGACTTTTTTTTTTTTTTTTTTTTTT        |
| Final library amplification primers for all libraries:                                                |
| RP1: AAT GAT ACG GCG ACC ACC GAG ATC TAC ACG TTC AGA GTT CTA CAG TCC GA                               |
| RP11: CAA GCA GAA GAC GGC ATA CGA GAT CGT GAT GTG ACT GGA GTT CCT TGG CAC CCG AGA ATT CCA             |
